# Supplementary material for: Nitidine chloride acts as an apoptosis inducer in human oral cancer cells and a nude mouse xenograft model via inhibition of STAT3
Source: PubMed Central journal article supplement (PMC5710925; doi:10.18632/oncotarget.20444), 2017-08-24
Supplement: oncotarget-08-91306-s001.pdf [file oncotarget-08-91306-s001.pdf]

## Nitidine chloride acts as an apoptosis inducer in human oral cancer cells and a nude mouse xenograft model via inhibition of STAT3

### SUPPLEMENTARY MATERIALS

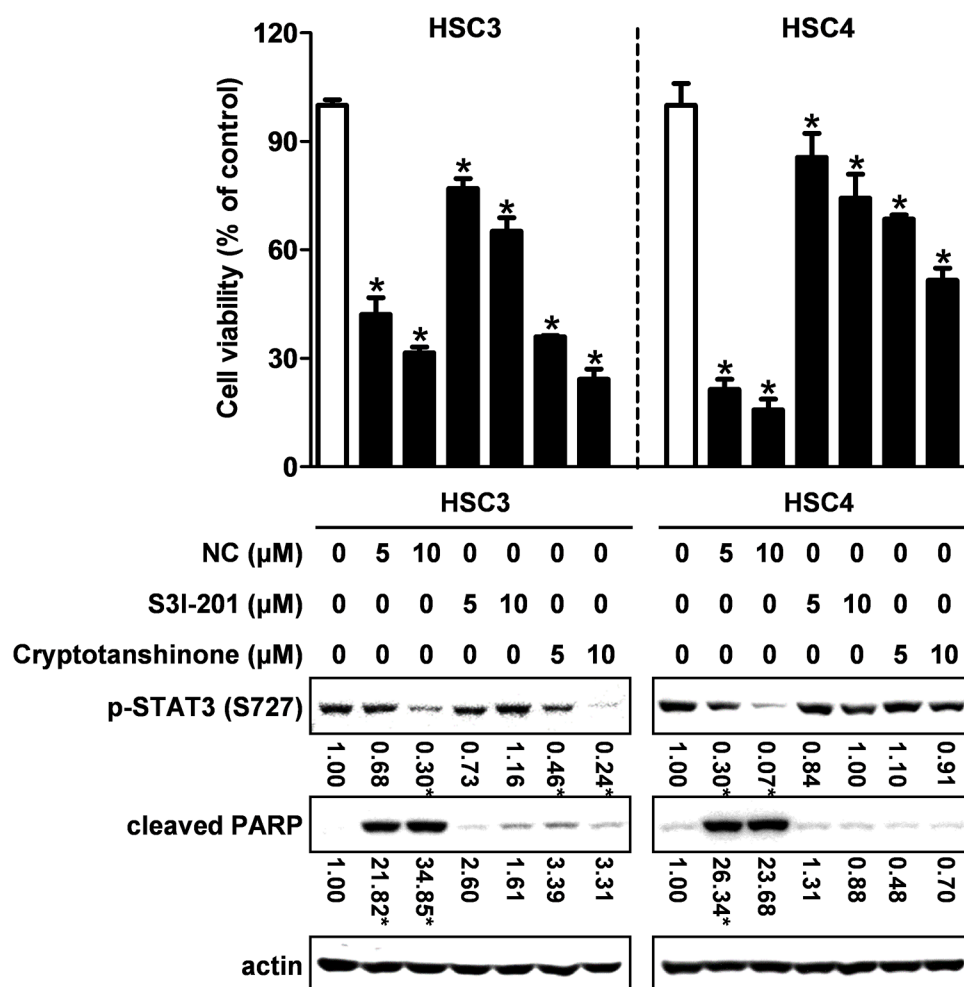

**Supplementary Figure 1: The effect of STAT3 inhibitors on cell growth and apoptosis in HSC and HSC4 cells.** Cells were treated with same concentration of S3I-201, cryptotanshinone and NC for 24hr. The growth inhibitory effect of STAT3 inhibitors was examined by trypan blue exclusion assay, and the effects of STAT3 inhibitors on PARP cleavage were analyzed by Western blot. The graphs represent the mean  $\pm$  S.D. of triplicate experiments. \*,  $p < 0.05$  is compared with control group.
